# Supplementary material for: Prognostic Effect of Underlying Chronic Kidney Disease and Renal Replacement Therapy on the Outcome of Patients after Out-of-Hospital Cardiac Arrest: A Nationwide Observational Study
Source: MDPI journal article supplement (doi:10.3390/medicina58030444), 2022-03-18
Supplement: s1 [file s1]

**Table S1. Definition and detailed classification of underlying disease.**

| Disease                     | Definition and detailed classification                                                                                                                                                                                                                                                                                                                                                                                                 |
|-----------------------------|----------------------------------------------------------------------------------------------------------------------------------------------------------------------------------------------------------------------------------------------------------------------------------------------------------------------------------------------------------------------------------------------------------------------------------------|
| Hypertension                | The disease was diagnosed by the doctor prior to cardiac arrest and is clearly stated in the medical record                                                                                                                                                                                                                                                                                                                            |
| Diabetes mellitus           | The disease was diagnosed by the doctor prior to cardiac arrest and is clearly stated in the medical record.                                                                                                                                                                                                                                                                                                                           |
| Heart disease               | <p>The disease was diagnosed by the doctor prior to cardiac arrest and is clearly stated in the medical record.</p> <p>(Ischemic heart disease, myocardial infarction, angina, valvular heart disease, arrhythmia, congestive heart disease, myocardopathy, congenital heart disease, previous heart intervention record including stent, primary coronary intervention, coronary artery bypass grafting, and other heart disease)</p> |
| Chronic kidney disease      | <p>The disease was diagnosed by the doctor prior to cardiac arrest and is clearly stated in the medical record.</p> <p>(chronic renal failure, dialysis, kidney transplantation, and other chronic kidney disease)</p>                                                                                                                                                                                                                 |
| Chronic respiratory disease | The disease was diagnosed by the doctor prior to cardiac arrest and is clearly stated in the medical record. (asthma, chronic obstructive pulmonary disease, pulmonary tuberculosis, other chronic respiratory disease.)                                                                                                                                                                                                               |
| Stroke                      | <p>The disease was diagnosed by the doctor prior to cardiac arrest and is clearly stated in the medical record.</p> <p>(cerebral infarction, cerebral haemorrhage, and unclassified stroke)</p>                                                                                                                                                                                                                                        |
| Dyslipidemia                | <p>The disease was diagnosed by the doctor prior to cardiac arrest and is clearly stated in the medical record.</p> <p>(hyperlipidaemia and unclassified dyslipidemia)</p>                                                                                                                                                                                                                                                             |

**Table S2. Demographic characteristics of the study population of two groups (non-CKD and CKD without RRT) after propensity score matching.**

| <b>Variables</b>                      | <b>Non-CKD<br/>(N=1,401)</b> | <b>CKD without RRT<br/>(N=1,401)</b> | <b><i>P-value</i></b> |
|---------------------------------------|------------------------------|--------------------------------------|-----------------------|
| <b>Sex, n (%)</b>                     |                              |                                      |                       |
| Male                                  | 845 (60.3%)                  | 844 (60.2%)                          | 1.000                 |
| <b>Age, years [median (IQR)]</b>      | 75.0 [64.0-81.0]             | 75.0 [65.0-81.0]                     | 0.681                 |
| <b>Location of CA</b>                 |                              |                                      |                       |
| Residential CA                        | 862 (61.5%)                  | 865 (61.7%)                          | 0.938                 |
| Non-residential CA                    | 539 (38.5%)                  | 536 (38.3%)                          |                       |
| <b>Witnessed CA</b>                   | 823 (58.7%)                  | 810 (57.8%)                          | 0.646                 |
| <b>Bystander CPR</b>                  | 298 (21.3%)                  | 316 (22.6%)                          | 0.438                 |
| <b>Bystander AED use</b>              | 1 (0.1%)                     | 1 (0.1%)                             | 1.000                 |
| <b>Cause of cardiac arrest</b>        |                              |                                      |                       |
| Cardiac origin                        | 1,351 (96.4%)                | 1,340 (95.6%)                        | 0.333                 |
| Non-cardiac origin                    | 50 (3.6%)                    | 61 (4.4%)                            |                       |
| <b>Initial cardiac rhythm</b>         |                              |                                      |                       |
| Shockable                             | 123 (8.8%)                   | 132 (9.4%)                           | 0.599                 |
| None-shockable                        | 1278 (91.2%)                 | 1269 (90.6%)                         |                       |
| <b>Prehospital ROSC</b>               | 95 (6.8%)                    | 92 (6.6%)                            | 0.880                 |
| <b>Underlying disease</b>             |                              |                                      |                       |
| DM                                    | 689 (49.2%)                  | 710 (50.7%)                          | 0.450                 |
| HTN                                   | 780 (55.7%)                  | 788 (56.2%)                          | 0.790                 |
| Dyslipidemia                          | 52 (3.7%)                    | 56 (4.0%)                            | 0.768                 |
| Heart disease                         | 384 (27.4%)                  | 436 (31.1%)                          | <b>0.034</b>          |
| Resp. disease                         | 110 (7.9%)                   | 117 (8.4%)                           | 0.678                 |
| Stroke                                | 138 (9.9%)                   | 160 (11.4%)                          | 0.198                 |
| <b>Post-cardiac arrest care</b>       |                              |                                      |                       |
| PCI                                   | 78 (5.6%)                    | 85 (6.1%)                            | 0.628                 |
| TTM                                   | 52 (3.7%)                    | 56 (4.0%)                            | 0.768                 |
| <b>Outcomes at hospital discharge</b> |                              |                                      |                       |
| Survival                              | 80 (5.7%)                    | 77 (5.5%)                            | 0.870                 |
| Good neurological outcome             | 71 (5.1%)                    | 46 (3.3%)                            | <b>0.023</b>          |

Abbreviations: CKD, chronic kidney disease; RRT, renal replacement therapy; IQR, interquartile range; CA, cardiac arrest; CPR, cardiopulmonary resuscitation; AED, automated external defibrillator; DM, diabetes mellitus; HTN, hypertension; PCI, primary coronary intervention; TTM, targeted temperature management; and ROSC, return of spontaneous circulation.

**Table S3. Demographic characteristics of the study population of two groups (non-CKD and CKD with RRT) after propensity score matching.**

| <b>Variables</b>                      | <b>Non-CKD<br/>(N=1,541)</b> | <b>CKD with RRT<br/>(N=1,541)</b> | <b><i>P-value</i></b> |
|---------------------------------------|------------------------------|-----------------------------------|-----------------------|
| <b>Sex, n (%)</b>                     |                              |                                   |                       |
| Male                                  | 986 (64.0%)                  | 956 (62.0%)                       | 0.279                 |
| <b>Age, years [median (IQR)]</b>      | 69.0 [58.0-78.0]             | 66.0 [56.0-74.0]                  | <b>&lt; 0.001</b>     |
| <b>Location of CA</b>                 |                              |                                   |                       |
| Residential CA                        | 863 (56.0%)                  | 871 (56.5%)                       | 0.799                 |
| Non-residential CA                    | 678 (44.0%)                  | 670 (43.5%)                       |                       |
| <b>Witnessed CA</b>                   | 928 (60.2%)                  | 926 (60.1%)                       | 0.971                 |
| <b>Bystander CPR</b>                  | 278 (18.0%)                  | 298 (19.3%)                       | 0.380                 |
| <b>Bystander AED use</b>              | 2 (0.1%)                     | 5 (0.3%)                          | 0.453                 |
| <b>Cause of cardiac arrest</b>        |                              |                                   |                       |
| Cardiac origin                        | 1,448 (94.0%)                | 1,428 (92.7%)                     | 0.171                 |
| Non-cardiac origin                    | 93 (6.0%)                    | 113 (7.3%)                        |                       |
| <b>Initial cardiac rhythm</b>         |                              |                                   |                       |
| Shockable                             | 152 (9.9%)                   | 163 (10.6%)                       | 0.552                 |
| None-shockable                        | 1389 (90.1%)                 | 1378 (89.4%)                      |                       |
| <b>Prehospital ROSC</b>               | 120 (7.8%)                   | 123 (8.0%)                        | 0.894                 |
| <b>Underlying disease</b>             |                              |                                   |                       |
| DM                                    | 750 (48.7%)                  | 740 (48.0%)                       | 0.746                 |
| HTN                                   | 758 (49.2%)                  | 807 (52.4%)                       | 0.084                 |
| Dyslipidemia                          | 41 (2.7%)                    | 32 (2.1%)                         | 0.343                 |
| Heart disease                         | 338 (21.9%)                  | 378 (24.5%)                       | 0.096                 |
| Resp. disease                         | 76 (4.9%)                    | 76 (4.9%)                         | 1.000                 |
| Stroke                                | 111 (7.2%)                   | 132 (8.6%)                        | 0.181                 |
| <b>Post-cardiac arrest care</b>       |                              |                                   |                       |
| PCI                                   | 100 (6.5%)                   | 103 (6.7%)                        | 0.885                 |
| TTM                                   | 76 (4.9%)                    | 84 (5.5%)                         | 0.570                 |
| <b>Outcomes at hospital discharge</b> |                              |                                   |                       |
| Survival                              | 108 (7.0%)                   | 102 (6.6%)                        | 0.721                 |
| Good neurological outcome             | 101 (6.6%)                   | 68 (4.4%)                         | <b>0.011</b>          |

Abbreviations: CKD, chronic kidney disease; RRT, renal replacement therapy; IQR, interquartile range; CA, cardiac arrest; CPR, cardiopulmonary resuscitation; AED, automated external defibrillator; DM, diabetes mellitus; HTN, hypertension; PCI, primary coronary intervention; TTM, targeted temperature management; and ROSC, return of spontaneous circulation.

**Table S4. Demographic characteristics of the study population of two groups (CKD without RRT and CKD with RRT) after propensity score matching.**

| <b>Variables</b>                      | <b>CKD without RRT<br/>(N=1,444)</b> | <b>CKD with RRT<br/>(N=1,444)</b> | <b><i>P-value</i></b> |
|---------------------------------------|--------------------------------------|-----------------------------------|-----------------------|
| <b>Sex, n (%)</b>                     |                                      |                                   |                       |
| Male                                  | 882 (61.1%)                          | 890 (61.6%)                       | 0.789                 |
| <b>Age, years [median (IQR)]</b>      | <b>72.0 [63.0-79.0]</b>              | <b>70.0 [62.0-76.0]</b>           | <b>&lt; 0.001</b>     |
| <b>Location of CA</b>                 |                                      |                                   |                       |
| Residential CA                        | 856 (59.3%)                          | 864 (59.8%)                       | 0.791                 |
| Non-residential CA                    | 588 (40.7%)                          | 580 (40.2%)                       |                       |
| <b>Witnessed CA</b>                   | <b>853 (59.1%)</b>                   | <b>852 (59.0%)</b>                | <b>1.000</b>          |
| <b>Bystander CPR</b>                  | <b>282 (19.5%)</b>                   | <b>278 (19.3%)</b>                | <b>0.888</b>          |
| <b>Bystander AED use</b>              | <b>1 (0.1%)</b>                      | <b>2 (0.1%)</b>                   | <b>1.000</b>          |
| <b>Cause of cardiac arrest</b>        |                                      |                                   |                       |
| Cardiac origin                        | 1373 (95.1%)                         | 1377 (95.4%)                      | 0.794                 |
| Non-cardiac origin                    | 71 (4.9%)                            | 67 (4.6%)                         |                       |
| <b>Initial cardiac rhythm</b>         |                                      |                                   |                       |
| Shockable                             | 132 (9.1%)                           | 135 (9.3%)                        | 0.898                 |
| None-shockable                        | 1312 (90.9%)                         | 1309 (90.7%)                      |                       |
| <b>Prehospital ROSC</b>               | <b>92 (6.4%)</b>                     | <b>91 (6.3%)</b>                  | <b>1.000</b>          |
| <b>Underlying disease</b>             |                                      |                                   |                       |
| DM                                    | 866 (60.0%)                          | 883 (61.1%)                       | 0.542                 |
| HTN                                   | 906 (62.7%)                          | 891 (61.7%)                       | 0.591                 |
| Dyslipidemia                          | 49 (3.4%)                            | 36 (2.5%)                         | 0.186                 |
| Heart disease                         | 501 (34.7%)                          | 492 (34.1%)                       | 0.754                 |
| Resp. disease                         | 89 (6.2%)                            | 80 (5.5%)                         | 0.526                 |
| Stroke                                | 166 (11.5%)                          | 149 (10.3%)                       | 0.340                 |
| <b>Post-cardiac arrest care</b>       |                                      |                                   |                       |
| PCI                                   | 77 (5.3%)                            | 82 (5.7%)                         | 0.744                 |
| TTM                                   | 64 (4.4%)                            | 61 (4.2%)                         | 0.855                 |
| <b>Outcomes at hospital discharge</b> |                                      |                                   |                       |
| Survival to hospital discharge        | 84 (5.8%)                            | 80 (5.5%)                         | 0.809                 |
| Good neurological outcome             | 67 (4.6%)                            | 59 (4.1%)                         | 0.524                 |

Abbreviations: CKD, chronic kidney disease; RRT, renal replacement therapy; IQR, interquartile range; CA, cardiac arrest; CPR, cardiopulmonary resuscitation; AED, automated external defibrillator; DM, diabetes mellitus; HTN, hypertension; PCI, primary coronary intervention; TTM, targeted temperature management; and ROSC, return of spontaneous circulation.

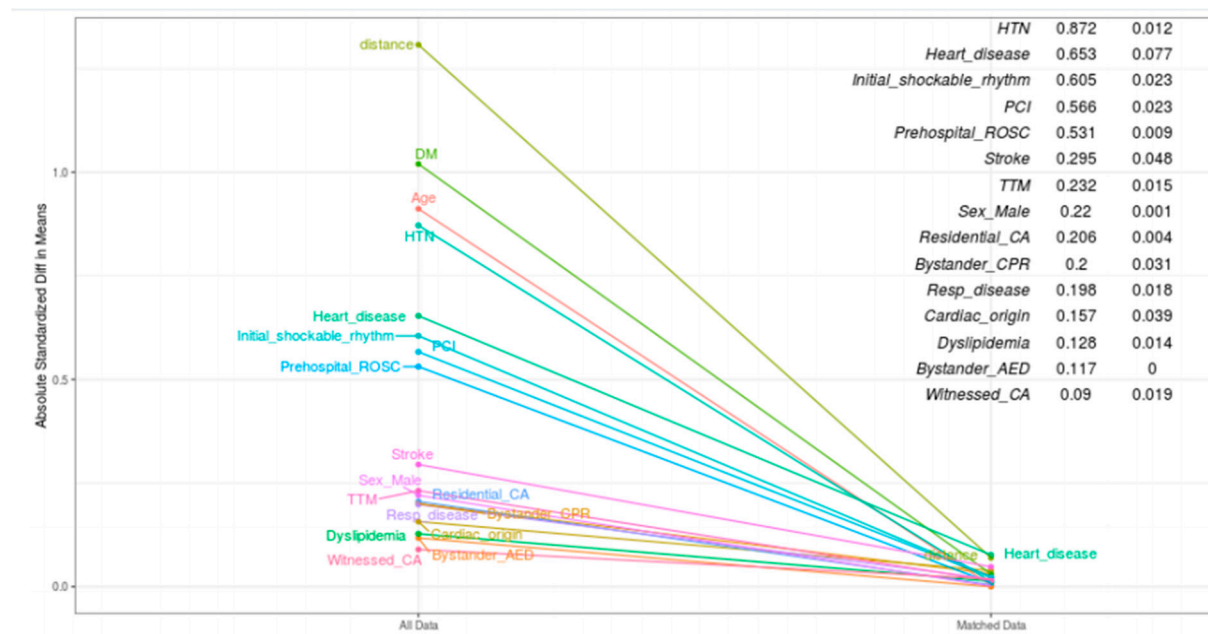

(A)

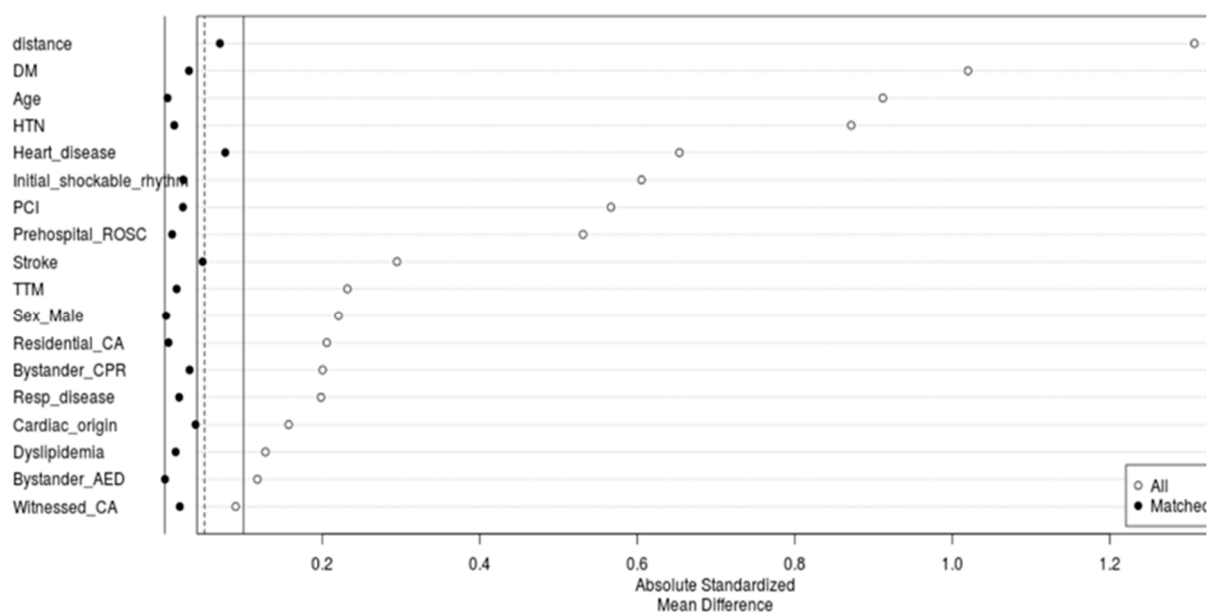

(B)

**Figure S1. Change of absolute standardized difference in means (A) and dot plot of absolute standardized mean difference (B) in patients with Non-CKD and CKD without RRT before and after propensity score matching.**

Abbreviations: CKD, chronic kidney disease; RRT, renal replacement therapy; CA, cardiac arrest; CPR, cardiopulmonary resuscitation; AED, automated external defibrillator; DM, diabetes mellitus; HTN, hypertension; PCI, primary coronary intervention; TTM, targeted temperature management; and ROSC, return of spontaneous circulation.

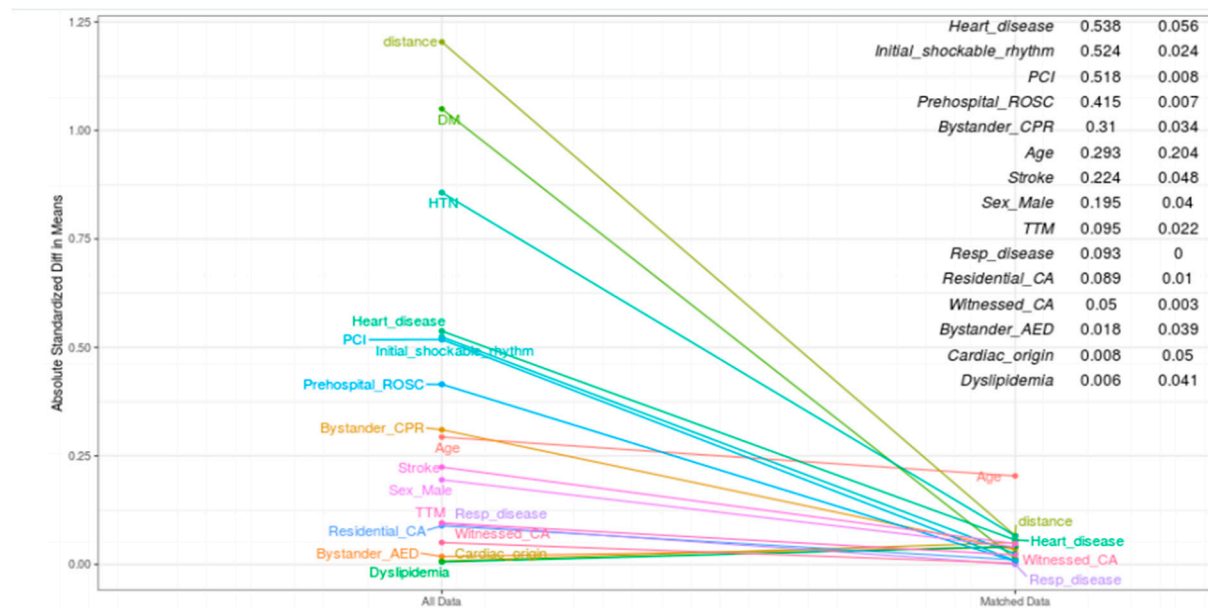

(A)

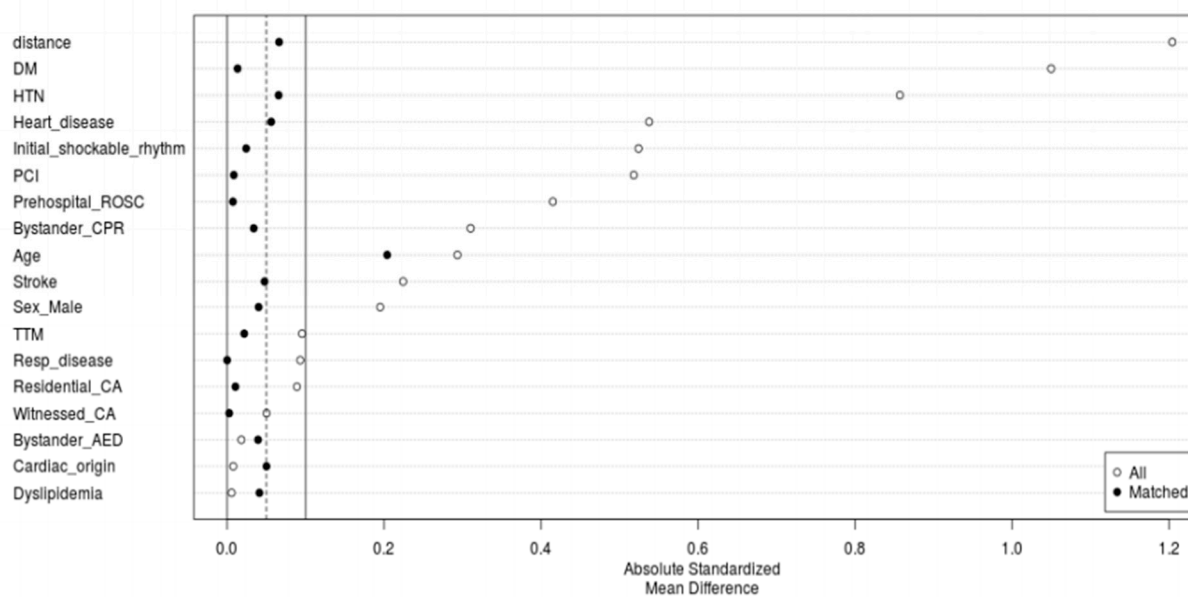

(B)

**Figure S2. Change of absolute standardized difference in means (A) and dot plot of absolute standardized mean difference (B) in patients with Non-CKD and CKD with RRT before and after propensity score matching.**

Abbreviations: CKD, chronic kidney disease; RRT, renal replacement therapy; CA, cardiac arrest; CPR, cardiopulmonary resuscitation; AED, automated external defibrillator; DM, diabetes mellitus; HTN, hypertension; PCI, primary coronary intervention; TTM, targeted temperature management; and ROSC, return of spontaneous circulation.

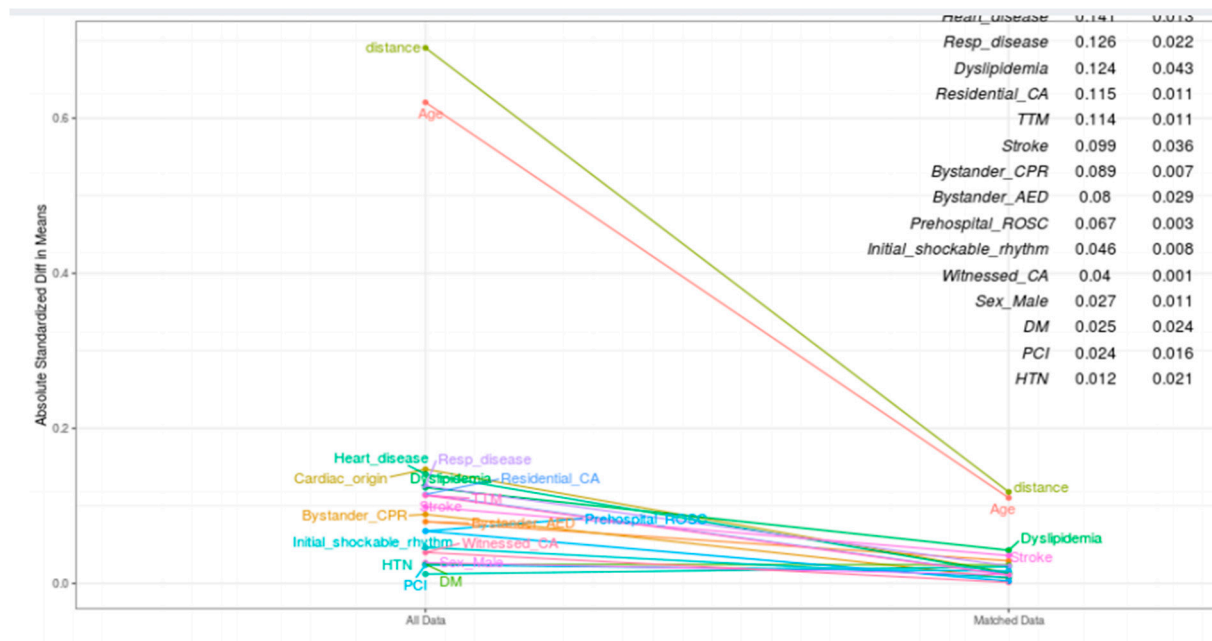

(A)

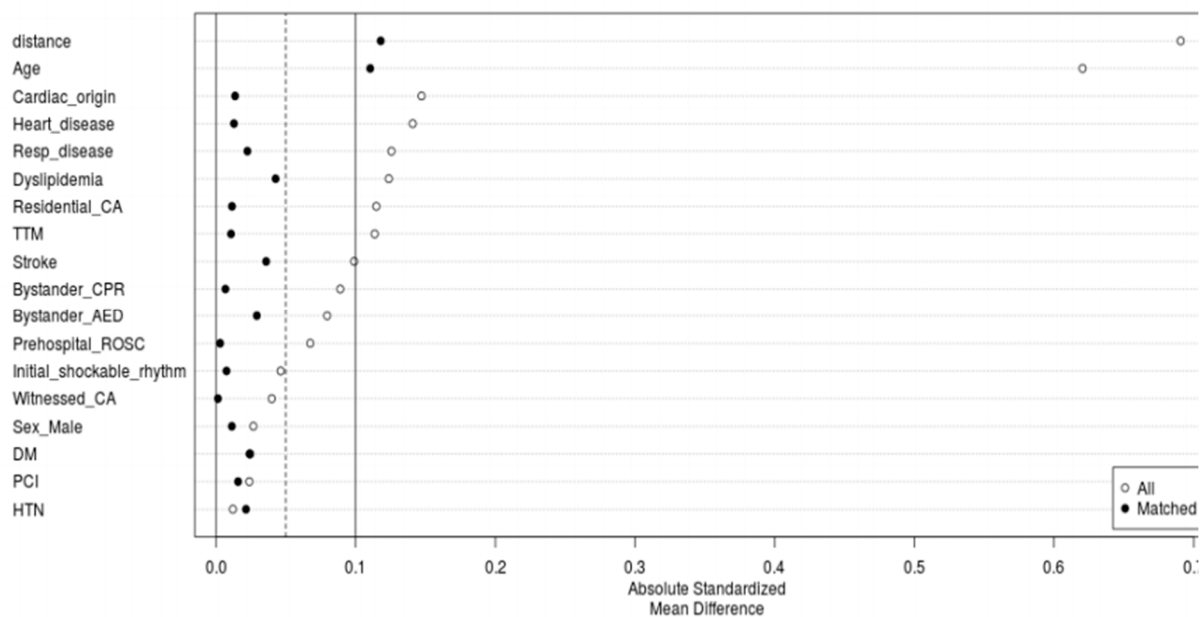

(B)

**Figure S3. Change of absolute standardized difference in means (A) and dot plot of absolute standardized mean difference (B) in patients with CKD without RRT and CKD with RRT before and after propensity score matching.**

Abbreviations: CKD, chronic kidney disease; RRT, renal replacement therapy; CA, cardiac arrest; CPR, cardiopulmonary resuscitation; AED, automated external defibrillator; DM, diabetes mellitus; HTN, hypertension; PCI, primary coronary intervention; TTM, targeted temperature management; and ROSC, return of spontaneous circulation.
